# Supplementary material
Source: MDPI journal article supplement (https://www.mdpi.com/2073-4441/13/24/3512)
Supplement: s1 [file s1]

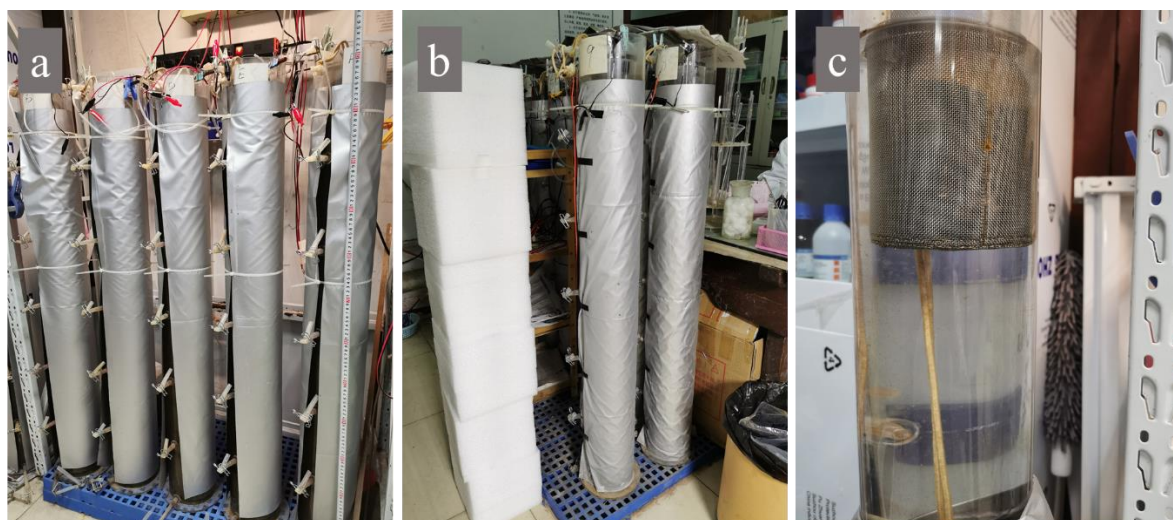

Figure S1 The photos of SMFC devices: the plexiglass cylinders (a & b); the GAC cathode (c)

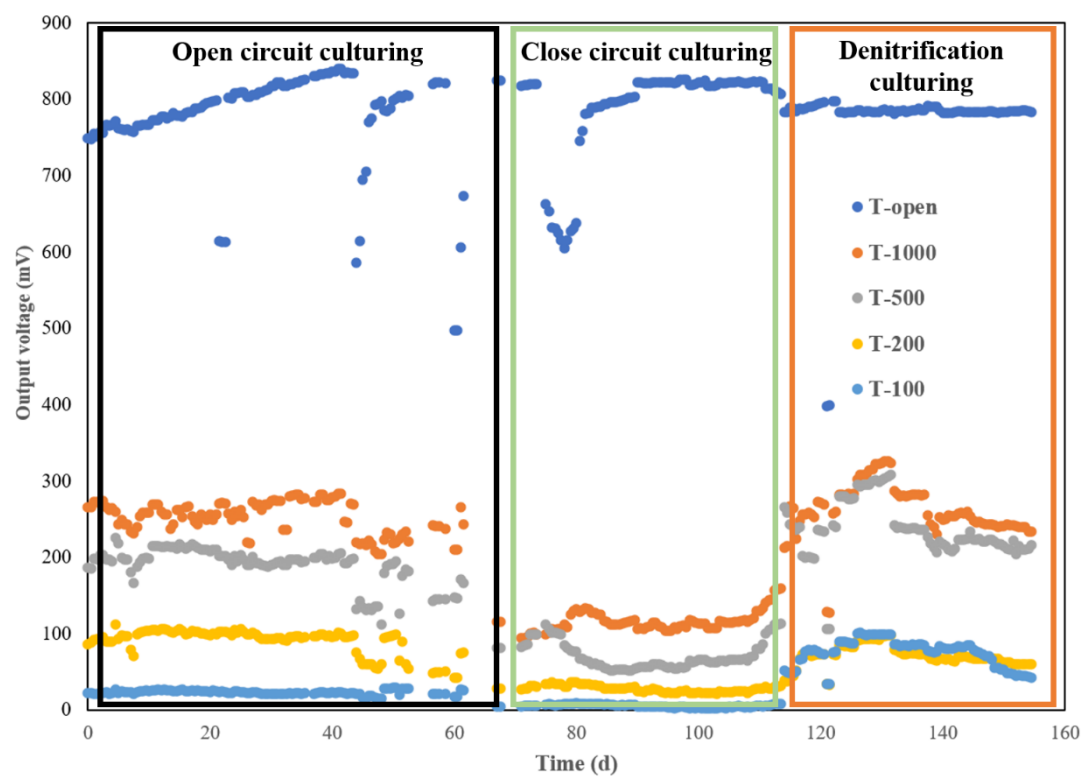

Figure S2. The output voltages of different treatments in culturing period.

Table S1. Material cost analysis of each SMFC device

|                  | Description               | Quantity | Unit           | Price (USD) | Sum (USD) |
|------------------|---------------------------|----------|----------------|-------------|-----------|
| anode            | carbon felt               | 0.01     | m <sup>2</sup> | 30          | 0.30      |
|                  | stainless-steel mesh      | 2        | piece          | 1           | 2         |
| cathode          | GAC                       | 0.19     | kg             | 0.68        | 0.13      |
|                  | stainless-steel cylinders | 1        | -              | 2           | 2         |
| External circuit | Titanium wire             | 1.5      | m              | 0.5         | 0.75      |
|                  | resistor                  | 1        | -              | 0.003       | 0.003     |
| Total            |                           |          |                |             | 5.183     |
